# Supplementary material for: Dynamics of Bacterial and Viral Communities in Paddy Soil with Irrigation and Urea Application
Source: PubMed Central journal article supplement (PMC6520780; doi:10.3390/v11040347), 2019-04-16
Supplement: viruses-11-00347-s001.pdf [file viruses-11-00347-s001.pdf]

# Dynamics of bacterial and viral communities in paddy soil with irrigation and urea application

Yuting Li <sup>1,2,3</sup>, Hao Sun <sup>1,4</sup>, Weichao Yang <sup>1,4</sup>, Guanxiong Chen <sup>1</sup> and Hui Xu <sup>1,4</sup> \*

<sup>1</sup> Institute of Applied Ecology, Chinese Academy of Sciences, Shenyang 110016, China; liyuting211@mails.ucas.ac.cn (Y.L.); haos@spaces.ac.cn (H.S.); yangweichao@iae.ac.cn (W.Y.); gxchen39@iae.ac.cn (G.C.)

<sup>2</sup> University of Chinese Academy of Sciences, Beijing 100049, China

<sup>3</sup> National Field Observation and Research Station of Shenyang Agro-Ecosystems, Shenyang 110016, China

<sup>4</sup> Key Laboratory of Pollution Ecology and Environmental Engineering, Institute of Applied Ecology, Chinese Academy of Sciences, Shenyang 110016, China

\* Correspondence: xuhui@iae.ac.cn (H.X.); Tel.: +86-024-8397-0369

## Supporting Information

**Supplementary Table S1** Viral and bacterial abundance ( $\times 10^6$ ) and viral-to-bacterial ratio.

|     | Viral abundance |                | Bacterial abundance |            | Virus / bacteria ratio |              |
|-----|-----------------|----------------|---------------------|------------|------------------------|--------------|
|     | PK              | PKN            | PK                  | PKN        | PK                     | PKN          |
| FP  | 942.87±15.33a   | 881.48±38.46b  |                     | 2.49±0.33  | 300.23±31.85           | 362.53±58.47 |
|     |                 |                | 3.17±0.28ae         | d          | ae                     | e            |
| FL3 | 822.79±53.34b   | 788.29±94.46b  |                     | 2.65±0.37  | 234.91±30.00           | 302.07±47.76 |
|     |                 |                | 3.53±0.28a          | de         | b                      | e            |
| AF1 | 1374.01±236.38  | 1033.13±148.19 |                     |            | 241.77±34.20           | 161.63±26.27 |
|     | cd              | ac             | 5.67±0.42b          | 6.42±0.24f | b                      | c            |
| AF4 | 1141.85±122.61  | 1537.05±247.20 |                     | 6.17±0.56  | 261.69±43.57           | 248.37±27.18 |
|     | c               | d              | 4.45±0.61c          | bf         | ab                     | b            |
| AF1 | 711.71±148.28b  | 972.58±132.71a |                     | 8.48±1.08  | 120.49±26.53           | 116.77±24.17 |
| 4   |                 | b              | 5.95±0.49bf         | g          | cf                     | f            |
| AF2 | 889.82±137.06a  | 899.36±119.26a | 6.04±1.51bc         | 8.71±1.86  | 153.06±28.58           | 107.28±22.45 |
| 1   | b               | b              | fg                  | g          | cf                     | fg           |

Different letters within a column show significant differences ( $p < 0.05$ )

FP, representing spring fallow period; FL3, third day of flooding; AF1, 4, 14, 21 refer to the first, fourth, 14th, and 21st days after fertilization, respectively.

**Supplementary Table S2** Viral and bacterial Shannon indices.

|      | Viral Shannon index |            | Bacterial Shannon index |              |
|------|---------------------|------------|-------------------------|--------------|
|      | PK                  | PKN        | PK                      | PKN          |
| FP   | 2.84±0.07a          | 2.01±0.02d | 11.67±0.07a             | 11.64±0.06af |
| FL3  | 2.97±0.15ace        | 3.01±0.02e | 11.24±0.02b             | 11.31±0.01e  |
| AF1  | 2.81±0.09a          | 3.04±0.05e | 11.41±0.05c             | 11.31±0.01e  |
| AF4  | 3.51±0.05b          | 3.35±0.03f | 10.95±0.06d             | 11.36±0.05ce |
| AF14 | 3.02±0.06c          | 3.09±0.13c | 11.33±0.02e             | 11.41±0.03c  |
| AF21 | 2.03±0.06d          | 2.01±0.02d | 11.48±0.01cf            | 11.54±0.04f  |

Different letters within a column show significant differences ( $p < 0.05$ )

FP, representing spring fallow period; FL3, third day of flooding; AF1, 4, 14, 21 refer to the first, fourth, 14th, and 21st days after fertilization, respectively.

**Supplementary Table S3** General features of the high throughput sequencing results and bacterial richness values.

|      | Total reads  |              | Observed OTUs |          | Chao1 index |            |
|------|--------------|--------------|---------------|----------|-------------|------------|
|      | PK           | PKN          | PK            | PKN      | PK          | PKN        |
| FP   | 112315±23631 | 92633±28849  | 5499±150      | 5371±97  | 18765±1080  | 17811±1200 |
| FL3  | 76935±20102  | 108327±35054 | 4806±27       | 4942±102 | 15145±838   | 15086±559  |
| AF1  | 126941±27066 | 141728±16901 | 5078±99       | 4987±45  | 16579±531   | 15069±179  |
| AF4  | 113166±46749 | 140313±88110 | 4596±53       | 4966±75  | 13989±1290  | 16443±180  |
| AF14 | 92892±27798  | 125079±52420 | 4950±44       | 5148±47  | 16426±171   | 16144±556  |
| AF21 | 103746±22575 | 134966±48337 | 5192±33       | 5297±40  | 16734±265   | 16810±774  |

FP, representing spring fallow period; FL3, third day of flooding; AF1, 4, 14, 21 refer to the first, fourth, 14th, and 21st days after fertilization, respectively.

**Supplementary Table S4** Relative abundance (%) of top 20 bacterial genera of all samples.

|                                    | FP    |       | FL3   |       | AF1   |       | AF4   |       | AF14  |       | AF21  |       |
|------------------------------------|-------|-------|-------|-------|-------|-------|-------|-------|-------|-------|-------|-------|
|                                    | PK    | PKN   | PK    | PKN   | PK    | PKN   | PK    | PKN   | PK    | PKN   | PK    | PKN   |
| <i>Nitrospira</i>                  | 1.357 | 1.327 | 2.563 | 2.827 | 2.347 | 2.270 | 2.043 | 1.807 | 2.563 | 2.213 | 2.870 | 1.390 |
| <i>Bacillus</i>                    | 2.027 | 0.930 | 1.220 | 2.270 | 1.700 | 3.253 | 3.717 | 1.103 | 1.767 | 0.840 | 1.603 | 1.700 |
| <i>Sphingomonas</i>                | 1.117 | 1.610 | 0.717 | 0.637 | 0.850 | 0.567 | 1.097 | 1.250 | 0.540 | 0.490 | 0.490 | 0.867 |
| <i>Geobacter</i>                   | 0.690 | 0.657 | 3.070 | 0.243 | 0.490 | 0.270 | 0.253 | 0.253 | 0.547 | 0.717 | 0.987 | 1.243 |
| <i>Aquicella</i>                   | 0.390 | 0.633 | 0.593 | 0.827 | 0.910 | 0.813 | 0.263 | 0.567 | 0.710 | 1.490 | 0.807 | 0.250 |
| <i>OM43 clade</i>                  | 0.067 | 0.027 | 1.653 | 0.537 | 0.703 | 0.023 | 2.903 | 0.817 | 0.757 | 0.113 | 0.110 | 0.030 |
| <i>Haliangium</i>                  | 0.593 | 0.413 | 0.693 | 0.580 | 0.620 | 0.630 | 0.477 | 0.360 | 0.403 | 0.397 | 0.540 | 0.600 |
| <i>Opitutus</i>                    | 0.153 | 0.103 | 0.537 | 0.623 | 0.580 | 0.967 | 0.173 | 0.520 | 0.607 | 1.013 | 0.600 | 0.393 |
| <i>Ferruginibacter</i>             | 0.570 | 0.763 | 0.570 | 0.323 | 0.493 | 0.557 | 0.560 | 0.777 | 0.263 | 0.377 | 0.477 | 0.287 |
| <i>Arthrobacter</i>                | 1.280 | 0.533 | 0.443 | 0.293 | 0.353 | 0.263 | 0.420 | 0.307 | 0.583 | 0.213 | 0.420 | 0.620 |
| <i>Pseudomonas</i>                 | 0.417 | 0.163 | 0.793 | 0.333 | 0.397 | 0.660 | 0.430 | 0.433 | 0.230 | 0.400 | 0.437 | 0.977 |
| <i>Lactococcus</i>                 | 0.237 | 0.087 | 0.280 | 0.573 | 0.510 | 0.777 | 1.210 | 0.307 | 0.483 | 0.157 | 0.463 | 0.490 |
| <i>Blastocatella</i>               | 0.490 | 0.997 | 0.370 | 0.183 | 0.417 | 0.283 | 0.423 | 0.753 | 0.350 | 0.407 | 0.380 | 0.343 |
| <i>Candidatus Solibacter</i>       | 0.510 | 0.743 | 0.430 | 0.287 | 0.263 | 0.437 | 0.340 | 0.387 | 0.377 | 0.453 | 0.447 | 0.553 |
| <i>Clostridium sensu stricto 1</i> | 0.360 | 1.100 | 0.397 | 0.707 | 0.133 | 0.597 | 0.133 | 0.450 | 0.097 | 0.747 | 0.217 | 0.207 |
| <i>Candidatus Nitrosopumilus</i>   | 0.060 | 0.017 | 0.510 | 0.697 | 0.990 | 0.777 | 0.040 | 0.037 | 0.247 | 0.790 | 0.590 | 0.367 |
| <i>Bryobacter</i>                  | 0.697 | 0.907 | 0.363 | 0.240 | 0.377 | 0.283 | 0.293 | 0.350 | 0.257 | 0.343 | 0.330 | 0.377 |
| <i>Roseiflexus</i>                 | 0.510 | 0.507 | 0.387 | 0.493 | 0.303 | 0.290 | 0.317 | 0.480 | 0.527 | 0.300 | 0.287 | 0.403 |
| <i>Longilinea</i>                  | 0.393 | 0.893 | 0.290 | 0.327 | 0.310 | 0.357 | 0.247 | 0.493 | 0.147 | 0.423 | 0.280 | 0.353 |
| <i>Flavobacterium</i>              | 0.147 | 0.130 | 0.633 | 0.523 | 0.133 | 0.283 | 0.117 | 0.660 | 0.133 | 0.207 | 0.283 | 0.883 |

FP, representing spring fallow period; FL3, third day of flooding; AF1, 4, 14, 21 refer to the first, fourth, 14th, and 21st days after fertilization, respectively.

**Supplementary Table S5** Correlation analysis of viral and bacterial assemblages, and environmental factors.

|                                       | VA              | BA              | VBR             |
|---------------------------------------|-----------------|-----------------|-----------------|
| <b>CK group, before fertilization</b> |                 |                 |                 |
| VA                                    | 1               | -0.709 [0.022]* | 0.930 [0.000]*  |
| BA                                    | -0.709 [0.022]* | 1               | -0.894 [0.000]* |
| VBR                                   | 0.930 [0.000]*  | -0.894 [0.000]* | 1               |
| pH                                    | -0.756 [0.011]* | 0.543 [0.105]   | -0.673 [0.033]* |
| SWC                                   | -0.867 [0.001]* | 0.394 [0.260]   | -0.687 [0.028]* |
| SOM                                   | 0.794 [0.006]*  | -0.430 [0.214]  | 0.638 [0.047]*  |
| Available P                           | 0.806 [0.005]*  | -0.406 [0.244]  | 0.669 [0.035]*  |
| Temp                                  | 0.079 [0.828]   | 0.395 [0.258]   | -0.104 [0.776]  |
| CH <sub>4</sub> emission              | -0.745 [0.013]* | 0.418 [0.229]   | -0.596 [0.069]  |
| CO <sub>2</sub> emission              | 0.879 [0.001]*  | -0.685 [0.029]* | 0.809 [0.005]*  |
| N <sub>2</sub> O emission             | -0.794 [0.006]* | 0.721 [0.019]*  | -0.772 [0.009]* |
| <b>CK group, after fertilization</b>  |                 |                 |                 |
| VA                                    | 1               | -0.168 [0.478]  | 0.886 [0.000]*  |
| BA                                    | -0.168 [0.478]  | 1               | -0.564 [0.010]* |
| VBR                                   | 0.886 [0.000]*  | -0.564 [0.010]* | 1               |
| pH                                    | -0.700 [0.001]* | 0.166 [0.485]   | -0.627 [0.003]* |
| SWC                                   | 0.415 [0.069]   | 0.038 [0.872]   | 0.308 [0.187]   |
| SOM                                   | 0.553 [0.011]*  | 0.093 [0.696]   | 0.408 [0.075]   |
| Available P                           | -0.526 [0.017]* | 0.463 [0.040]*  | -0.687 [0.001]* |
| Temp                                  | -0.005 [0.985]  | -0.124 [0.602]  | 0.033 [0.890]   |
| CH <sub>4</sub> emission              | 0.074 [0.758]   | -0.002 [0.995]  | 0.081 [0.734]   |
| CO <sub>2</sub> emission              | -0.344 [0.137]  | 0.598 [0.005]*  | -0.517 [0.020]* |
| N <sub>2</sub> O emission             | -0.075 [0.753]  | 0.162 [0.494]   | -0.033 [0.890]  |
| <b>U group, before fertilization</b>  |                 |                 |                 |
| VA                                    | 1               | -0.224 [0.533]  | 0.809 [0.005]*  |
| BA                                    | -0.224 [0.533]  | 1               | -0.657 [0.039]* |
| VBR                                   | 0.809 [0.005]*  | -0.657 [0.039]* | 1               |
| pH                                    | -0.444 [0.199]  | -0.146 [0.688]  | -0.329 [0.353]  |
| SWC                                   | -0.697 [0.025]* | 0.467 [0.174]   | -0.809 [0.005]* |
| SOM                                   | 0.079 [0.829]   | 0.152 [0.676]   | 0.176 [0.626]   |
| Available P                           | 0.430 [0.214]   | -0.030 [0.934]  | 0.340 [0.336]   |
| Temp                                  | 0.383 [0.275]   | 0.432 [0.213]   | 0.055 [0.880]   |
| CH <sub>4</sub> emission              | -0.297 [0.405]  | 0.224 [0.533]   | -0.365 [0.300]  |
| CO <sub>2</sub> emission              | 0.661 [0.038]*  | -0.503 [0.138]  | 0.821 [0.004]*  |
| N <sub>2</sub> O emission             | -0.685 [0.029]* | 0.273 [0.446]   | -0.644 [0.044]* |
| <b>U group, after fertilization</b>   |                 |                 |                 |
| VA                                    | 1               | -0.499 [0.025]* | 0.845 [0.000]*  |
| BA                                    | -0.499 [0.025]* | 1               | -0.835 [0.000]* |
| VBR                                   | 0.845 [0.000]*  | -0.835 [0.000]* | 1               |
| pH                                    | -0.429 [0.053]  | 0.477 [0.033]*  | -0.600 [0.005]* |
| SWC                                   | 0.199 [0.401]   | -0.370 [0.108]  | 0.364 [0.114]   |
| SOM                                   | 0.021 [0.930]   | 0.245 [0.298]   | -0.050 [0.835]  |
| Available P                           | 0.170 [0.474]   | -0.149 [0.531]  | 0.216 [0.361]   |
| Temp                                  | 0.073 [0.760]   | 0.126 [0.598]   | 0.051 [0.830]   |
| CH <sub>4</sub> emission              | 0.415 [0.048]*  | -0.403 [0.078]  | 0.453 [0.045]*  |
| CO <sub>2</sub> emission              | -0.101 [0.673]  | 0.026 [0.915]   | -0.084 [0.724]  |
| N <sub>2</sub> O emission             | -0.168 [0.478]  | 0.296 [0.205]   | -0.227 [0.336]  |

VA, viral abundance; BA, bacterial abundance; VBR, virus-to-bacterium ratio; SOM, soil organic matter; SWC, soil water content

\*Significant correlations ( $P \leq 0.05$ ). Probability values in square brackets.

**Supplementary Table S6** PERMANOVA indicating no significances are observed in the composition of dominant bacterial genera (>1%) among all samples.

|              | Df | Sums Of Sqs | Mean Sqs | F. Model | R2      | Pr(>F) | Sig. |
|--------------|----|-------------|----------|----------|---------|--------|------|
| <b>Group</b> | 1  | 0.03585     | 0.035851 | 1.3905   | 0.03929 | 0.246  | ns   |
| Residuals    | 34 | 0.87661     | 0.025783 | 0.96071  |         |        |      |
| Total        | 35 | 0.91246     | 1        |          |         |        |      |

**Supplementary Table S7** Accumulated constrained eigenvalues and biplot scores for constraining variables of RDA.

| <b>Accumulated constrained eigenvalues</b> |            |                      |                       |
|--------------------------------------------|------------|----------------------|-----------------------|
|                                            | Eigenvalue | Proportion explained | Cumulative proportion |
| RDA1                                       | 0.004882   | 0.409856             | 0.409856              |
| RDA2                                       | 0.001743   | 0.146285             | 0.556141              |
| RDA3                                       | 0.001489   | 0.124976             | 0.681118              |
| RDA4                                       | 0.001206   | 0.101272             | 0.78239               |
| RDA5                                       | 0.001101   | 0.092444             | 0.874834              |
| RDA6                                       | 0.000622   | 0.052171             | 0.927004              |
| RDA7                                       | 0.000341   | 0.028643             | 0.955647              |
| RDA8                                       | 0.000263   | 0.022035             | 0.977682              |
| RDA9                                       | 0.000117   | 0.009812             | 0.987494              |
| RDA10                                      | 8.06E-05   | 6.77E-03             | 9.94E-01              |
| RDA11                                      | 6.84E-05   | 5.74E-03             | 1.00E+00              |

  

| <b>Biplot scores for constraining variables</b> |          |         |          |          |         |         |
|-------------------------------------------------|----------|---------|----------|----------|---------|---------|
|                                                 | RDA1     | RDA2    | RDA3     | RDA4     | RDA5    | RDA6    |
| VA                                              | -0.17401 | -0.7395 | 0.05952  | 0.12979  | -0.3613 | 0.1815  |
| BA                                              | 0.30586  | -0.4369 | 0.1955   | 0.05198  | 0.2219  | 0.5946  |
| VBR                                             | -0.51331 | 0.1016  | -0.34365 | -0.05486 | -0.2807 | -0.4592 |
| Available_P                                     | -0.36655 | 0.1564  | 0.35427  | -0.11281 | 0.6758  | -0.131  |
| pH                                              | 0.62556  | 0.329   | 0.14503  | -0.26766 | -0.3094 | 0.1331  |
| Viral Diversity                                 | 0.23533  | -0.2019 | 0.26924  | 0.36752  | -0.3269 | -0.3342 |
| SOM                                             | -0.15275 | -0.574  | -0.46407 | 0.11944  | 0.1038  | 0.3481  |
| Temperature                                     | 0.4268   | -0.3398 | 0.13022  | 0.29123  | 0.2542  | 0.3852  |
| CH <sub>4</sub>                                 | 0.62193  | -0.451  | 0.19795  | 0.27213  | -0.3633 | 0.306   |
| CO <sub>2</sub>                                 | -0.06302 | -0.6043 | 0.09608  | -0.12022 | 0.1455  | 0.2487  |
| N <sub>2</sub> O                                | 0.32207  | -0.2334 | -0.1596  | -0.26671 | 0.028   | 0.1813  |

VA, viral abundance; BA, bacterial abundance; VBR, virus-to-bacterium ratio; SOM, soil organic matter

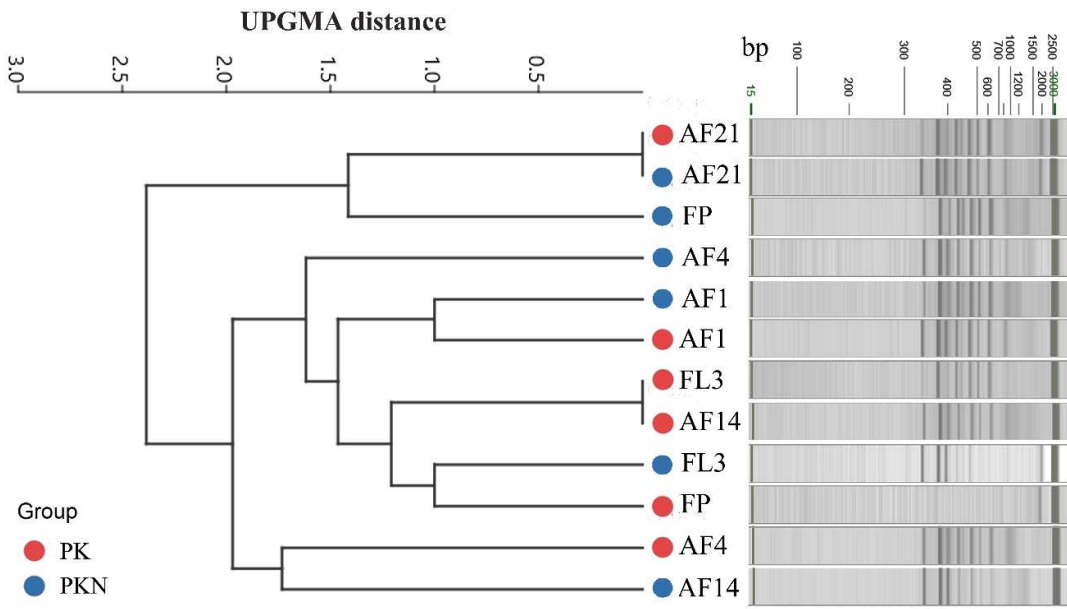

**Supplementary Figure S1** RAPD electrophoretogram of viral diversity and cluster analysis of all samples. FP, representing spring fallow period; FL3, third day of flooding; AF1, 4, 14, 21 refer to the first, fourth, 14th, and 21st days after fertilization, respectively.

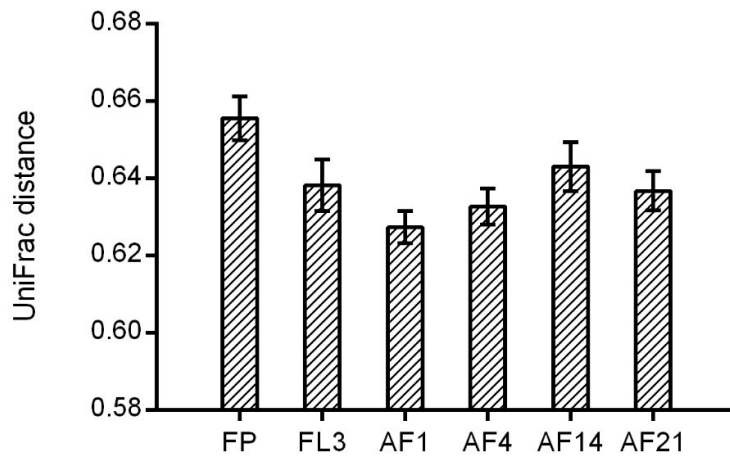

**Supplementary Figure S2** UniFrac distance between bacterial communities on six sampling days. FP, representing spring fallow period; FL3, third day of flooding; AF1, 4, 14, 21 refer to the first, fourth, 14th, and 21st days after fertilization, respectively.

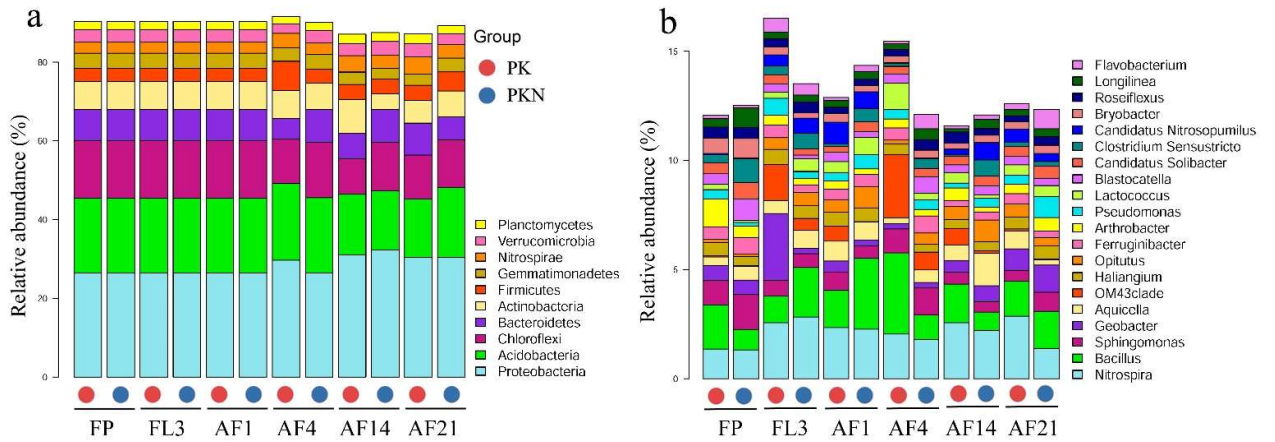

**Supplementary Figure S3** Dominant bacterial populations and their composition: top 10 phyla (a) and top 20 genera (b) of all samples. FP, representing spring fallow period; FL3, third day of flooding; AF1, 4, 14, 21 refer to the first, fourth, 14th, and 21st days after fertilization, respectively.

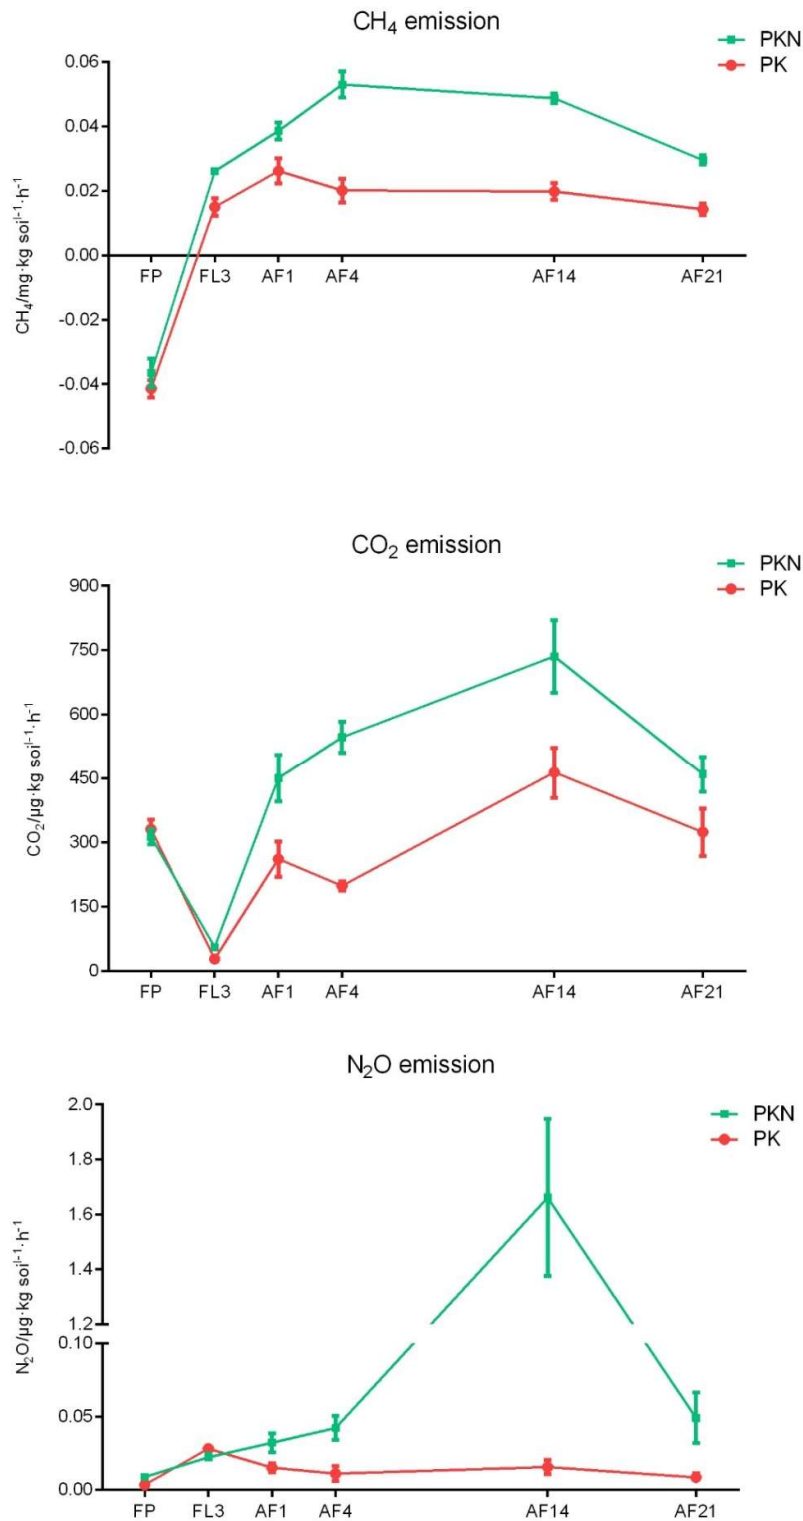

**Supplementary Figure S4** Dynamics of  $\text{CH}_4$ ,  $\text{CO}_2$  and  $\text{N}_2\text{O}$  emissions of all samples. FP, representing spring fallow period; FL3, third day of flooding; AF1, 4, 14, 21 refer to the first, fourth, 14th, and 21st days after fertilization, respectively.

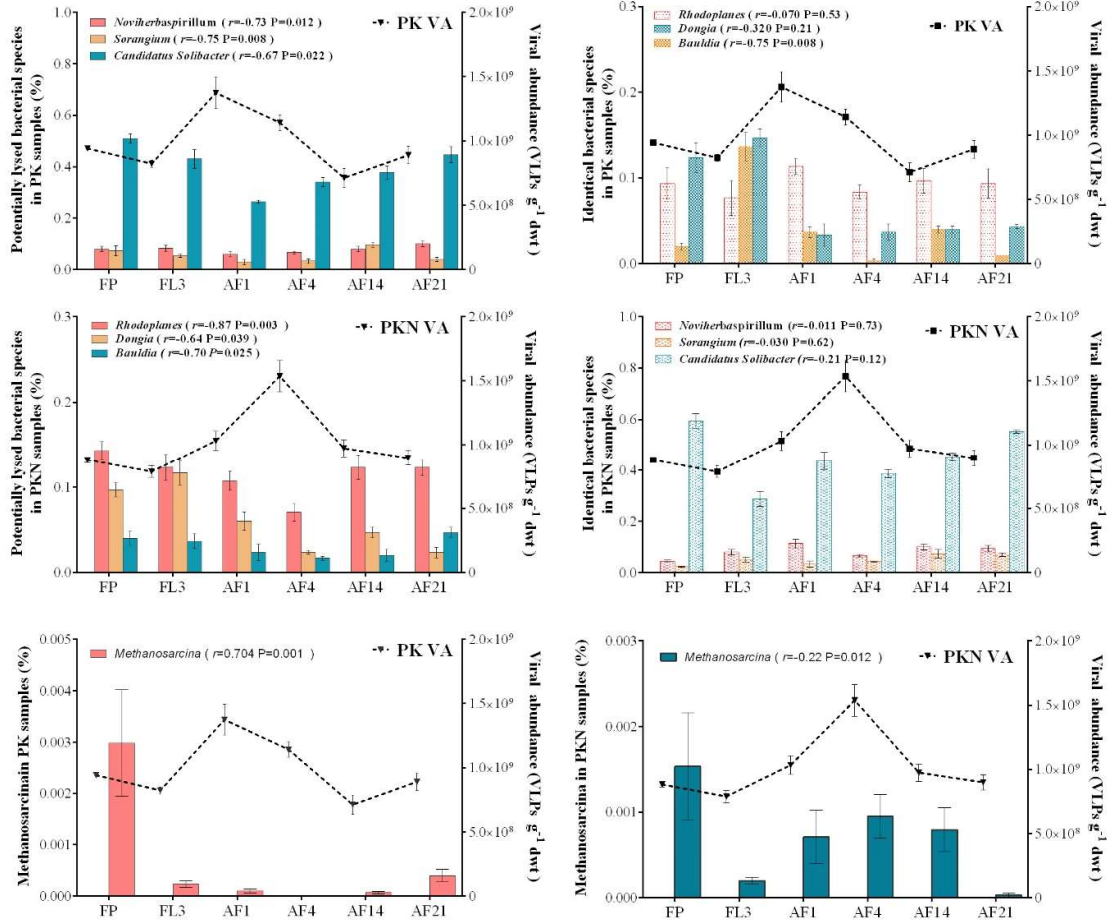

**Supplementary Figure S5** In the CK group, dynamics of bacteria which are potentially lysed in the U group; and in the U group, dynamics of bacteria which in the CK group are potentially lysed. FP, representing spring fallow period; FL3, third day of flooding; AF1, 4, 14, 21 refer to the first, fourth, 14th, and 21st days after fertilization, respectively.
